# Supplementary material for: Insect Herbivory on Main Stem Enhances Induced Defense of Primary Tillers in Rice (Oryza sativa L.)
Source: MDPI journal article supplement (doi:10.3390/plants12051199), 2023-03-06
Supplement: s1 [file s1]

Supplemental Table S1

**TABLE S1.** Gene-specific primers for quantitative RT-PCR.

| Genes          | Accession NO. | Specific Primer                                                      | Size   |
|----------------|---------------|----------------------------------------------------------------------|--------|
| <i>OsAOS</i>   | AK068620      | F: 5'-CGAGCTCTTCCTCCGATACG-3'<br>R: 5'-GTCAGAAGGTGGCCTTCTTGAG-3'     | 100 bp |
| <i>OsAOC</i>   | AJ493664      | F: 5'-CTGCCTCAACAACCTTCACCA-3'<br>R: 5'-GGATCAGTTCATCGGCTCAT-3'      | 238 bp |
| <i>OsCOII</i>  | AY168645      | F: 5'- TTGCCGTGAATTGGAGTACATAG-3'<br>R: 5'-GTCAAGTAGCACAAGCCGAAAG-3' | 115 bp |
| <i>OsLOX</i>   | AF464895      | F: 5'-CCGAGCTTGACGCGAAGA -3'<br>R: 5'-GATCGTCGTCGTCCACATTGT -3'      |        |
| <i>OsBBPI</i>  | HC731644      | F: 5'- GCTCATCTGCGAGGACATCT -3'<br>R: 5'- TTCCTCATGGTCCACACAAG -3'   | 214 bp |
| <i>OsACTIN</i> | X15865        | F: 5'-CTGACGGAGCGTGGTTAC-3'<br>R: 5'-GGAAGGCGGGAAGAGGAC-3'           | 219 bp |
